# Supplementary material for: The Critical Periphery in the Growth of Social Protests
Source: PLOS journal article supplement (doi:10.1371/journal.pone.0143611), 2015-11-30
Supplement: S1 (10.1371/journal.pone.0143611.s001) [file journal.pone.0143611.s001]

(listing pending)
